# Supplementary material
Source: Research Square preprint supplement (doi:10.21203/rs.3.rs-9744395/v1)
Supplement: Supplementary file 1 [file 05d9f4862d3572b41f756680.docx]

**Opposing Carbon Dioxide Removals and emissions reductions confuses mitigation policies**

**Table s1**. Analysis of CDR-classified methodologies

| Methodology | Classified as… | Brief description | Active removal from the atmosphere? | Permanent storage? |
| --- | --- | --- | --- | --- |
| VM0047 (ARR): Afforestation, Reforestation & Revegetation, v1.1 (VERRA) | Removal | Considers increases in the density of trees and other types of woody vegetation | Yes, and due to either direct or indirect activities | It depends on fires, harvest, pests, land use policy or any other factors affecting tree health |
| VM0032: Adoption of Sustainable Grasslands through Adjustment of Fire and Grazing, v1.0 (VERRA) | Emissions reduction (methane from animals) and removal (soil carbon) | Sustainable adjustment of the timing/ density of grazing animals and the intensity/ frequency of prescribed fires | Yes, soil sequestration by manipulating variables that determine the grazing activities and fire management in grassland areas | As long as the soils’ dynamics and fire management are maintained |
| VM0042: Improved Agricultural Land Management, v2.1  (VERRA) | Emission reductions and soil organic carbon removal | Improved agricultural land management practices: reduced tillage, improved fertilizer application, etc. | Yes, if woody biomass is included in the project boundary with associated A/R | As long as improved agricultural practices are maintained |
| VM0044: Biochar Utilization in Soil and Non-Soil Applications, v1.2  (VERRA) | Removal | Removals from the conversion of waste biomass into biochar in greenfield facilities | No, as the methodology only accepts biogenic waste biomass and not purpose-grown biomass | The methodology requires soil and non-soil applications that “*prove carbon-persistent over time*” |
| VM0033: Tidal Wetland and Seagrass Restoration, v2.1 (VERRA) | Emissions reduction (e.g. reduced peat depletion, forest or soil subsidence) and removal (e.g. increased vegetation cover) | Activities aimed at restoring and creating tidal wetlands: managing hydrological conditions, sediment supply, etc. | Yes, by increasing biomass production | As long as sustainable management of tidal wetlands and seagrass is maintained |
| VM0049: Carbon Capture and Storage, v1.0 (VERRA) | Emission reductions and removal | Project activities capture CO2 from the atmosphere or point sources at a facility and store it permanently in geological storage complexes | Only in the case of Direct Air Capture, but the methodology also includes post-combustion and pre-combustion capture (among others) that are not associated with an active removal of carbon | Storage is assumed permanent/ very long term |
| Carbonated Materials Methodology for CO2 Removal (puro.earth) | Removal | To be counted as removal, the CO2 mineralised in the carbonated material should be of biogenic origin or from direct capture from the ambient atmosphere | Not necessarily. As the criterion for including carbon of “biogenic origin” is “*of eligible types, and EU or national legislation must be followed in the sourcing and extraction of the raw materials used*”, we conclude that the scope is wide and includes, e.g. residues. Furthermore, CO2 removal can be achieved by “*preventing its entrance in the atmosphere and converting the CO2 to a stabile, durable storage*”. | Yes, according to the assessment of carbonated material by the IPCC |
| Terrestrial storage of biomass (puro.earth) | Removal | It quantifies the net CO2 removal achieved over 100 years  by the storage of eligible biomass (lignocellulosic: trees and hard-stemmed plants)in adequate terrestrial storage systems | Not necessarily as eligible biomass includes waste biomass with carbon capture outside of the project boundary | It depends on the storage facilities and conditions, but assumed to be long-term as long as the storage place is not disturbed (e.g. water infiltrations or outright destruction) |
| Enhanced Rock Weathering (puro.earth) | Removal | It aims to accelerate the chemical weathering  process by spreading finely ground rock powder or  other suitable weathering materials to the soil | Yes, due to the specific and active establishment of the conditions (e.g. material spreading to the soil) for enhanced rock weathering to happen | Yes, it is documented as one of the most permanent forms of removal with low risk of reversal |
| Ocean alkalinity enhancement (OAE) from coastal outfalls (Isometric) | Removal (and avoided emissions?) | OAE aims to speed up natural processes by adding CO₂-reactive alkalinity to the surface ocean, leading to re-equilibration of the atmospheric and oceanic carbon reservoirs through increasing the flux of CO₂ from the atmosphere to the ocean, or reducing the outgassing of CO₂ | Yes because the action of enhancing alkalinity in the ocean leads to more intake of CO2 by the oceans; but enhanced alkalinity could also reduce outgassing of CO2 from the oceans, which is equivalent to avoided emissions | In theory removals are very long term (10 k- 100 k years), but reversal can occur due to large-scale deployment of CDR, and/ or reduced concentration of CO2 in the atmosphere resulting in outgassing from the ocean |
| Biomass fermentation with carbon capture and geological storage (Gold Standard) | Removal | CO₂ from biomass fermentation is captured and stored in geological reservoirs; the source of CO₂ must be renewable biomass (“*either cultivated in dedicated plantations or is derived from biomass residues*”) | Not necessarily, it depends on the source of biomass; as eligible biomass can be residues, then cases of avoided emissions are included | Storage is assumed permanent/ very long term (geological reservoirs) |
| Bioenergy with carbon capture and storage (BECSS) (Drax & Stockholm Exergi) | Removal | BECCS technology captures CO₂ and permanently stores it in geological reservoirs, and CO₂ must come from “sustainably sourced biomass”; it applies to BECCS projects using thermal combustion of solid biomass fuels | Depends on the cases, but unlikely so; when the project includes the retrofitting of an existing biomass power and/ or heat plant there is no active removal of carbon because the biomass would have been produced and supplied regardless | Storage is assumed permanent/ very long term (geological reservoirs) |
